# Supplementary material for: A direct Fe–O coordination at the FePc/MoOxinterface investigated by XPS and NEXAFS spectroscopies
Source: Royal Society of Chemistry journal article supplement (doi:10.1039/c4cp04199b), 2014-12-15
Supplement: c4cp04199b1.pdf [file c4cp04199b1.pdf]

## Supporting Information

### **A direct Fe-O coordination at FePc/MoO<sub>x</sub> interface investigated by XPS and NEXAFS spectroscopies**

Lingyun Liu<sup>a</sup>, Wenhua Zhang<sup>a\*</sup>, Panpan Guo<sup>a</sup>, Kai Wang<sup>a</sup>, Jiaou Wang<sup>b</sup>, Haijie Qian<sup>b</sup>, Ibrahim  
Kurash<sup>b</sup>, Chia-Hsin Wang<sup>c</sup>, Yaw-Wen Yang<sup>c</sup>, and Faqiang Xu<sup>a\*</sup>

<sup>a</sup>*National Synchrotron Radiation Laboratory, University of Science and Technology of China,  
Hefei, Anhui 230029, P.R.China*

<sup>b</sup>*Beijing Synchrotron Radiation Laboratory, Institute of High Energy Physics, Chinese Academy of  
Sciences, Beijing 100039, P.R.China*

<sup>c</sup>*National Synchrotron Radiation Research Center, Hsinchu, 30076, Taiwan*

\* W. Zhang: email: [zhaowh@ustc.edu.cn](mailto:zhaowh@ustc.edu.cn); tel, 86-551-63602060.

\* F. Xu: email: [fqxu@ustc.edu.cn](mailto:fqxu@ustc.edu.cn); tel, 86-551-63602127.

## 1. Fitting parameters for Mo 3d

**Table S1** shows Mo 3d XPS peak fitting parameters for Fig 1a of the manuscript, including binding energy ( $E_B$ ), peak intensity (Intensity), and full width at half maximum (FWHM).

| Mo species     |    | $E_B$<br>(eV)     | Intensity | FWHM<br>(eV) | Amount |
|----------------|----|-------------------|-----------|--------------|--------|
| <b>As-depo</b> | +6 | 3d <sub>3/2</sub> | 235.7     | 115          | 100%   |
|                |    | 3d <sub>5/2</sub> | 232.6     | 220          |        |
| <b>250 °C</b>  | +6 | 3d <sub>3/2</sub> | 235.7     | 98           | 51.1%  |
|                |    | 3d <sub>5/2</sub> | 232.6     | 163          |        |
|                | +m | 3d <sub>3/2</sub> | 234.7     | 87           | 48.9%  |
|                |    | 3d <sub>5/2</sub> | 231.6     | 163          |        |
| <b>300 °C</b>  | +6 | 3d <sub>3/2</sub> | 235.7     | 165          | 61.2%  |
|                |    | 3d <sub>5/2</sub> | 232.6     | 252          |        |
|                | +m | 3d <sub>3/2</sub> | 234.7     | 95           | 36.0%  |
|                |    | 3d <sub>5/2</sub> | 231.6     | 150          |        |
|                | +4 | 3d <sub>3/2</sub> | 232.2     | 8            | 2.8%   |
|                |    | 3d <sub>5/2</sub> | 229.1     | 11           |        |
| <b>350 °C</b>  | +6 | 3d <sub>3/2</sub> | 235.7     | 190          | 51.9%  |
|                |    | 3d <sub>5/2</sub> | 232.6     | 310          |        |
|                | +m | 3d <sub>3/2</sub> | 234.7     | 106          | 26.6%  |
|                |    | 3d <sub>5/2</sub> | 231.5     | 150          |        |
|                | +n | 3d <sub>3/2</sub> | 233.9     | 40           | 11.4%  |
|                |    | 3d <sub>5/2</sub> | 230.6     | 70           |        |
|                | +4 | 3d <sub>3/2</sub> | 232.2     | 39           | 10.1%  |
|                |    | 3d <sub>5/2</sub> | 229.1     | 58           |        |
| <b>400 °C</b>  | +6 | 3d <sub>3/2</sub> | 235.5     | 150          | 43.7%  |
|                |    | 3d <sub>5/2</sub> | 232.6     | 208          |        |
|                | +m | 3d <sub>3/2</sub> | 234.6     | 65           | 20.8%  |

|                   |               |                   |                   |       |      |       |
|-------------------|---------------|-------------------|-------------------|-------|------|-------|
|                   |               | 3d <sub>5/2</sub> | 231.5             | 105   | 1.20 | 15.9% |
|                   |               | 3d <sub>3/2</sub> | 233.7             | 50    | 1.20 |       |
|                   |               | 3d <sub>5/2</sub> | 230.5             | 80    | 1.20 |       |
|                   | +4            | 3d <sub>3/2</sub> | 232.2             | 70    | 0.50 | 19.5% |
|                   |               | 3d <sub>5/2</sub> | 229.1             | 90    | 0.55 |       |
|                   | <b>450 °C</b> | +6                | 3d <sub>3/2</sub> | 235.7 | 95   | 1.30  |
| 3d <sub>5/2</sub> |               |                   | 232.6             | 173   | 1.30 |       |
| +m                |               | 3d <sub>3/2</sub> | 234.7             | 48    | 1.30 | 20.4% |
|                   |               | 3d <sub>5/2</sub> | 231.5             | 76    | 1.25 |       |
| +n                |               | 3d <sub>3/2</sub> | 233.8             | 39    | 1.20 | 16.6% |
|                   |               | 3d <sub>5/2</sub> | 230.5             | 62    | 1.25 |       |
| +4                |               | 3d <sub>3/2</sub> | 232.3             | 46    | 0.6  | 19.2% |
|                   |               | 3d <sub>5/2</sub> | 229.2             | 71    | 0.6  |       |

Note: “+m” and “+n” represent the medium states of Mo ions between +6 and +4 valence states. The Lorentz-Gaussian (GL%) ratio is fixed as 20% during the fitting process.

## 2. AFM image for MoO<sub>x</sub> adsorbed with 1 ML FePc

**Fig. S1** displays the morphology of 1 ML FePc adsorbed MoO<sub>x</sub> sample. It is seen the FePc adsorption has less influence to the morphology of the MoO<sub>x</sub> substrate after annealing at 400 °C. The MoO<sub>x</sub> particles appear to be comparable to the size of the bare MoO<sub>x</sub> substrate that shown in Figure 2b in the article. For the annealed FePc/MoO<sub>x</sub> sample, the root mean square roughness is ~5.36 nm in contrast to the 1.2 nm of the bare MoO<sub>x</sub> due to the FePc adsorption.

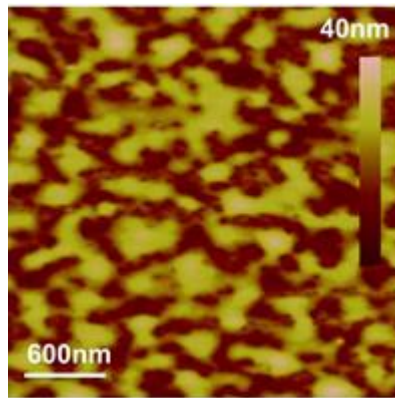

**Fig. S1** The AFM image of FePc film adsorbed on the MoO<sub>x</sub> surface annealed at 400 °C

### 3. N 1s core level

**Figure S2** shows the N 1s XPS spectra for the multilayer (top) and monolayer (bottom) FePc films adsorbed on MoO<sub>x</sub>. For the multilayer FePc films, the dominant peak at 398.6 eV are assigned to the two types of N atoms of the pyrrole (N<sub>P</sub>) and the bridge nitrogen between the pyrrole ring (N<sub>B</sub>). These two types of N atoms are difficult to resolve because of a small energy difference of ~0.2 eV. In addition, a small shoulder appears at the higher binding energy in both spectra, which are ascribed to the shake-ups of nitrogen. As to the one monolayer FePc, there is only one main peak at 399.6 eV, while a small shoulder can still be deconvoluted with a sharply declined intensity. There is a large energetic shift of about 1 eV between the one monolayer FePc and the multilayer FePc.

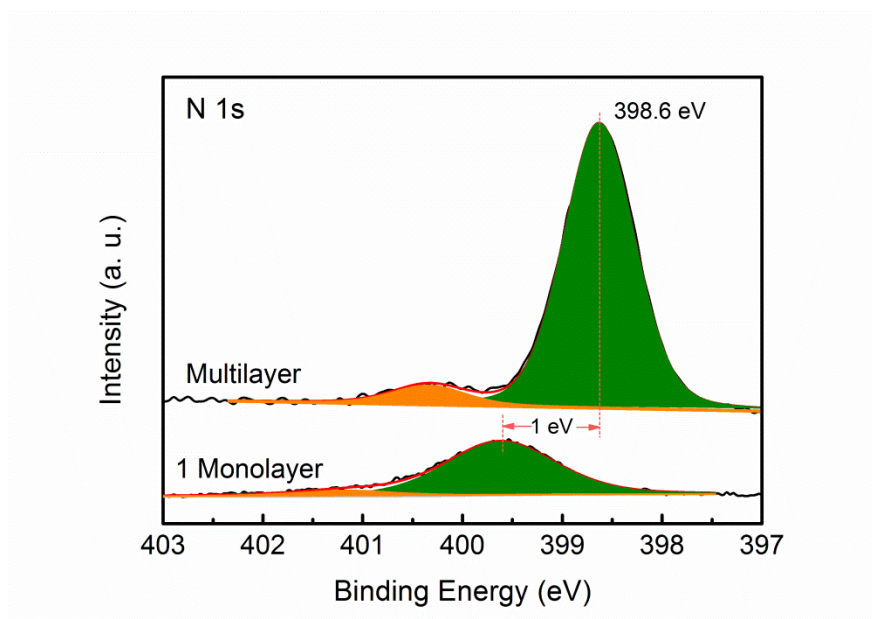

**Figure S2** N 1s XPS spectra of the multilayer (top) and monolayer (bottom) FePc films adsorbed on MoO<sub>x</sub>.

#### 4. Fitting parameters for O 1s core level

**Table S2** shows the fitting parameters and results for O 1s XPS spectra in Fig. 5 of the manuscript.

| O 1s species                          |                      | E <sub>B</sub> (eV) | Intensity | FWHM (eV) | Amount |
|---------------------------------------|----------------------|---------------------|-----------|-----------|--------|
| <b>MoO<sub>x</sub></b>                | O-Mo <sup>6+</sup>   | 530.2               | 81000     | 1.10      | 42.4%  |
|                                       | O-Mo <sup>m,n+</sup> | 530.8               | 69042     | 1.25      | 36.1%  |
|                                       | O-Mo <sup>4+</sup>   | 531.6               | 41000     | 1.50      | 21.5%  |
| <b>1 ML FePc/<br/>MoO<sub>x</sub></b> | O-Mo <sup>6+</sup>   | 530.2               | 20000     | 1.00      | 19.0%  |
|                                       | O-Mo <sup>m,n+</sup> | 530.7               | 50500     | 1.30      | 48.0%  |
|                                       | O-Mo <sup>4+</sup>   | 531.6               | 25000     | 1.45      | 33.8%  |
|                                       | O <sub>new</sub>     | 532.3               | 9600      | 1.31      | 9.2%   |

Note: “+m” and “+n” represent the oxygen species bonding to the Mo ions with +m and +n valence states, respectively. The two types of O-Mo bonds were fitted with one oxygen component due to the limited resolution. The Lorentz-Gaussian (GL%) is fixed as 20% during the fitting process.

### 5. C K-edge XAS spectra

**Fig. S3** shows the dependence of C K-edge XAS spectra on the x-ray incidence angle ( $35^\circ$ ,  $50^\circ$  and  $90^\circ$ ) for 1 ML FePc films adsorbed on the  $\text{MoO}_x$  substrate. The XAS spectra are characterized by multiple absorption peaks, basically associated with transitions to the empty states located on the benzene and pyrrole macrocycles of  $\pi^*$  and  $\sigma^*$  characters. It is seen the angular dependence of C K-edge is very small, suggesting a lack of uniform orientation in the film.

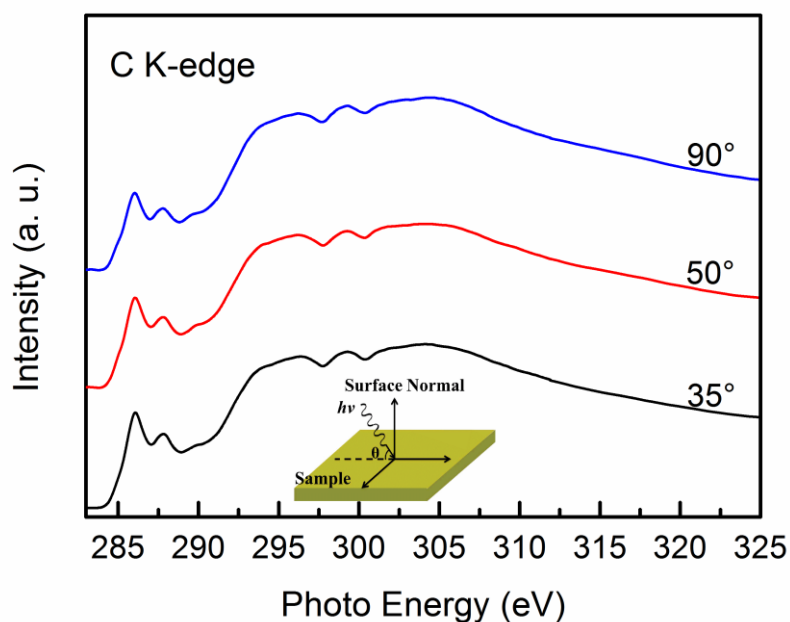

**Fig. S3** C K-edge XAS spectra for 1 ML FePc film at different x-ray incidence angle of  $35^\circ$ ,  $50^\circ$  and  $90^\circ$ . The inset shows the incident angle  $\theta$  of the incident light with respect to the sample plane.

## 6. Fe 2p XPS spectra

**Fig. S4** shows the Fe 2p XPS spectra for the 1 ML and multilayer FePc films that adsorbed on the MoO<sub>x</sub>. Both spectra are dominated by two main peaks. The one at the BE of 721.8 eV is related to the Fe 2p<sub>1/2</sub> level, and the other at BE of 708.4 eV is the 2p<sub>3/2</sub> level. The Fe 2p of the 1 ML FePc sample shift ~0.7 eV towards the higher BE with respect to the multilayer.

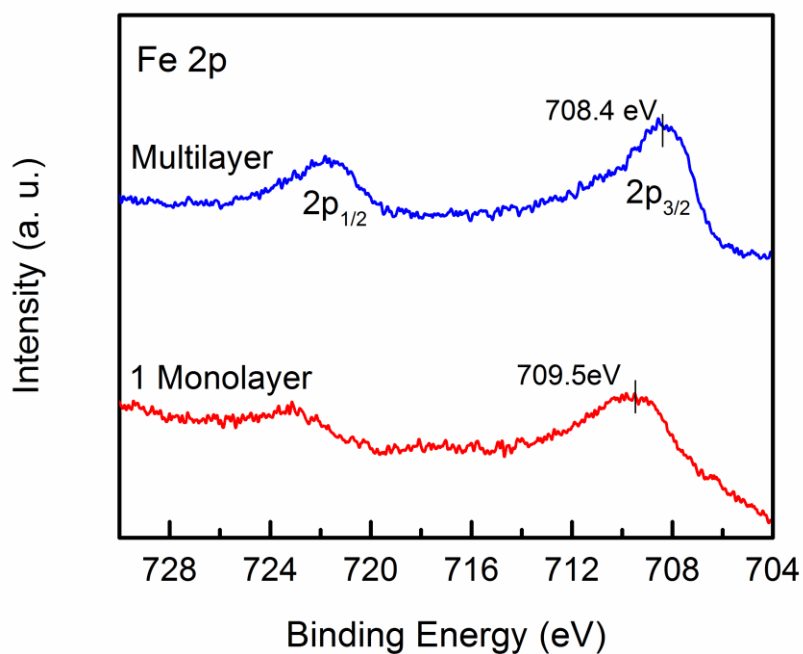

**Figure S4** Fe 2p XPS spectra of the multilayer (top) and monolayer (bottom) FePc films adsorbed on MoO<sub>x</sub>.
